# Supplementary material
Source: PubMed Central journal article supplement (PMC527204)
Supplement: plntcell_tpc.104.026476_1.pdf [file plntcell_tpc.104.026476_1.pdf]

| Bait                       | Prey          | Result                                                                              | Bait                        | Prey                       | Result                                                                                |
|----------------------------|---------------|-------------------------------------------------------------------------------------|-----------------------------|----------------------------|---------------------------------------------------------------------------------------|
| <b>VirB1</b><br>(Octopine) | <b>AtRAB8</b> |    | <b>VirB1</b><br>(Nopaline)  | <b>AtRAB8</b>              |    |
|                            | <b>BTI1</b>   |    |                             | <b>BTI1</b>                |    |
|                            | <b>BTI2</b>   |    |                             | <b>BTI2</b>                |    |
|                            | <b>BTI3</b>   |    |                             | <b>BTI3</b>                |    |
| <b>VirB5</b><br>(Octopine) | <b>AtRAB8</b> |    | <b>VirB1*</b><br>(Nopaline) | <b>AtRAB8</b>              |    |
|                            | <b>BTI1</b>   |    |                             | <b>BTI1</b>                |    |
|                            | <b>BTI2</b>   |    |                             | <b>BTI2</b>                |    |
|                            | <b>BTI3</b>   |    |                             | <b>BTI3</b>                |    |
| <b>VirD2</b><br>(Octopine) | <b>AtRAB8</b> |    | <b>AtRAB8</b>               | <b>VirE1</b><br>(Octopine) |    |
|                            | <b>BTI1</b>   |    | <b>BTI1</b>                 |                            |    |
|                            | <b>BTI2</b>   |    | <b>BTI2</b>                 |                            |    |
|                            | <b>BTI3</b>   |    | <b>BTI3</b>                 |                            |    |
| <b>VirE2</b><br>(Octopine) | <b>AtRAB8</b> |    | <b>AtRAB8</b>               | <b>VirF</b><br>(Octopine)  |    |
|                            | <b>BTI1</b>   |   | <b>BTI1</b>                 |                            |   |
|                            | <b>BTI2</b>   |  | <b>BTI2</b>                 |                            |  |
|                            | <b>BTI3</b>   |  | <b>BTI3</b>                 |                            |  |
