# Supplementary material
Source: PubMed Central journal article supplement (PMC527204)
Supplement: plntcell_tpc.104.026476_2.pdf [file plntcell_tpc.104.026476_2.pdf]

BTI1 ATGGCGGAAGAACATAAGCATGATGAATCTGTGATCGCTCCTGAGCCAGCTGTTGAGGTT  
BTI2 ATGGCGGATGAACATAAGCATGAAGAATCTTCACCTAATTTGGATCCAGCAGTGGAGGTT  
BTI3 -----ATGGTGGAAGAC  
\*\* \*\* \*

BTI1 GTGGAG---AGAGAATCGTTGATGGATAAGATATCGGAGAAGATCCATCACGGTGGTGAT  
BTI2 GTAGAG---AGGGAATCGTTGATGGAGAAGTTATCGGAGAAGATCCATCACAAAGGTGAT  
BTI3 CACAAGCACGAGGAATCGATCTTGGAGAAGATTGTTGAGAAGATCCATGGCCACGGTGAC  
\*\* \* \*\* \*\* \* \*\* \*\* \* \*\* \*\* \*

BTI1 TCTTCTTCGCTTCTTTCATCTTCTGATGATGAAGACGAGAAGAAGACTAAGAAGCCC  
BTI2 TC-----GTCGTCTTCATCATCATCAGATGACGAAAACGAGAAGAAGTCTT-----CG  
BTI3 TC-----GTCTTCTCTGTCC-----GATTCCGACGACGATAAGAAATCTA-----CA  
\*\* \*\*\* \*\* \*\* \*\* \*\* \*\* \*\* \*\* \*\* \*\* \*\* \*\* \* \*\* \*\* \*\* \*\* \*

BTI1 TCTTCTCCTTCGTCTTCTATGAAATCGAAAAGTTTACCGCTTGTTCGGACGAGAGCAGCCT  
BTI2 TCATCGTCTCCAAAGTCTTTGAAATCGAAGGTTTATCGTTTGTTCGGAAGAGAGACCT  
BTI3 TCGTCTTCGTGCTCGTCCCTTCAAGTCAAAGATTACCGACTTTTCGGAAGGGAGAAACCT  
\*\* \*\* \* \* \*\* \* \*\* \* \*\* \* \*\* \* \*\* \* \*\* \* \*\* \*

BTI1 GTTCATAAGGTTCTCGGCGGTGGAAAAGCCGGCTGATATATTCATGTGGAAGAACAAGAAG  
BTI2 GTTCATAAGGTTCTCGGCGGCGGAAAACCCGGCAGATATATTTATGTGGAAGGACAAGAAA  
BTI3 GTTCACAAGGTTCTCGGTGGTGGAAAACCTGCTGATATATTCCTTTGGAGGAACAAGAAG  
\*\*\*\* \*\*\*\*\* \*\* \*\*\*\*\* \*\* \* \*\*\*\*\* \* \*\*\*\* \* \*\*\*\*\*

BTI1 ATGTCTGGTGGTGTACTTGGTGGTGTACAGCTGCTTGGGTTGTGTTTGAATTGATGGAG  
BTI2 ATGTGAGGAGGTGATTTGGCGGTGTACAGTGGCATGGGTGTATTTGAATTGATGGAG  
BTI3 ATATCTGGTGGAGTCTTGGGTGCTGTAAGTGGTCTTGGGTTCTTATTCGAGTTATTCGAA  
\* \* \* \* \* \* \* \* \* \* \* \* \* \* \* \* \* \* \* \* \* \* \* \* \* \* \*

BTI1 TACCATCTTCTCACTCTGCTTTGCCACGTGATGATGTTGTTCTCGCTGTGCTGTTTTTTG  
BTI2 TATCATCTTCTTACTCTGTTATGTCACGTTATGATCGTTGCTCTGCTGTGTTGTTTCTA  
BTI3 TACCATCTCCTCGCTTTTCTCTGTCACCTTTGCGATTTTTCGCTCTGTCAGCATTGTTCTTG  
\*\* \*\*\*\*\* \*\* \* \* \* \* \* \* \* \* \* \* \* \* \* \* \* \* \* \* \* \* \* \*

BTI1 TGGTCTAATGCCACTATGTTTCATTACAAGTCCCCTCAAAGATTCCCTGAAGTTCATATC  
BTI2 TGGTCTAATGCCACTATGTTTCATTACAAGTCTCCACCAAAGATTCCCTGAAGTTCATATC  
BTI3 TGGTCTAATGCTTGTACATTATCCACAAGTCAACTCCTCACATCCCGGAAGTTCACATC  
\*\*\*\*\* \*\* \*\*\*\*\* \*\*\*\*\* \* \* \* \* \* \* \* \* \* \* \*

BTI1 CCTGAAGAACCTATTCTTTCAGCTTGGCTTGGGCTCAGAATCGAGATCAACCGTGGATTC  
BTI2 CCTGAAGAACCTCTTCTTTCAGCTTGGCTTGGGCTTTAGAATCGAAATCAACCGTGGGATC  
BTI3 CCTGAAGATCCTATTCTTCAACTTGTCTGGAATTAAGGATTGAAATCAATCGTGGTTTTG  
\*\*\*\*\* \*\* \*\*\*\*\* \*\*\*\*\* \* \* \* \* \* \* \* \* \* \* \* \* \*

BTI1 TCTTCTCTCCGTGAAATTCATCAGGAAGGATCTCAAGAAATTCCTCATGCTATTGCC  
BTI2 TCTTCTCTTCGTGAGATTGCGTCGGGGAGGATATCAAGAAAGTTCCCTCTCTGCTATTGCC  
BTI3 ACCCTTCTTAGGAACATTGCATCAGGAAAAGATGTCAAGAAATTTATCCTGGTAATTGCT  
\* \*\*\* \* \* \*\*\*\*\* \*\* \* \* \* \* \* \* \* \* \* \* \* \* \* \* \*

BTI1 GGGTTATGGGTTCTCTCAATCTTGGGCGGTTGCTTCAACTTCTTGACATTGGCATAACATA  
BTI2 GGATTGTGGGTTCTATCGATCTTGGGCGGCTGCTATAGTTTCTTGACATTGGCATAACATA  
BTI3 GGCTTGTGGGTTTTGTCCATTATTGGCAGCTGCTACAACCTCTTGACATTGTTCTACACT  
\*\* \*\* \*\*\*\*\* \* \* \* \* \* \* \* \* \* \* \* \* \* \* \* \* \* \* \* \* \*

BTI1 GCTCTTGTGTTGCTCTTTCACGGTTCCTCTTGCCACGACAAGTATGAAGACAAAGTCGAC  
BTI2 GCTCTGGTTCGTCTTTCACGTTTCCTCTTTTCTACGACAAGTACGAAGACAAAGTAGAC  
BTI3 GCTACTGTCTTCTCTTTCACCATTCCTGTACTCTACGAGAAGTATGAGGACAAAGTAGAT  
\*\*\* \*\* \* \*\*\*\*\* \*\*\*\*\* \* \*\*\*\*\* \*\*\*\*\* \*\* \*\*\*\*\* \*\*

BTI1 CCATTAGGTGAGAAAGCAATGATCGAGCTCAAGAAGCAGTATGCAGTGTGGATGAGAAG  
BTI2 TCATACGGTGAGAAAGCAATGGCTGAGTTGAAGAAGCAATACGCTGTGTTGGACGCAAAG  
BTI3 GCCTATGGGGAGAAGGCGATGAGGGAGATCAAAAAGCAATATGCAGTACTTGATGAGAAG  
\* \* \*\* \*\*\*\*\* \*\* \*\*\* \*\* \* \*\* \*\*\*\*\* \*\* \*\* \* \*\* \* \*\* \* \*\*

BTI1 GTGTTG-----AGCAAGATCCCACTTGGGCCGTTGAAGAACAAGAAGAAAGAT  
BTI2 GTATTC-----AGCAAAATCCCAAGAGGACCGTTGAAAGACAAGAAGAAGGAT  
BTI3 GTATTGCGTAAGGTCATAAGCAAGATTCCAAGAGGAGCTCTGAA---CAAGAAGAAGGAT  
\*\* \*\* \*\*\*\*\* \*\* \*\*\* \*\* \* \*\* \*\*\*\*\* \*\*\*\*\* \*\*

BTI1 TAG  
BTI2 TAG  
BTI3 TAA  
\*\*
