# Supplementary material
Source: PubMed Central journal article supplement (PMC527204)
Supplement: plntcell_tpc.104.026476_3.pdf [file plntcell_tpc.104.026476_3.pdf]

BTI1 AAGGTTTGGCTCTAATTAAGTAAACGAACCTGTAGCTTCGGAAGTTCGTATCCGAACCAA  
BTI2 -AAGCATCGCTCTAGTTAAGGAAGC-A-----GC-----AGGTTTGGATCCGAACCAA  
BTI3 -----

BTI1 CCAACGGCTCAGATTAGTTTCATATT-TTCAACGGCTGAGATTAGAGTTTCGATTTCTTT  
BTI2 CCAACGGATCAGATCAGAAACAAAATATTCAACGGCTCAGATTT-ATTCTAATTTTCCTC  
BTI3 -----

BTI1 CTTCTATTTTTAGGCTTCGAGATCTTTTCTTCTCAAAGGTAAAACTTTGGGAAGCAGCT  
BTI2 CTTTTATTGTTGGTTTTT---TCATTCTGACTTCGAGATCTTTCTTCTCAGAGGTGTAACG  
BTI3 -----ACACGCT  
\*

BTI1 AAAATACTGTGTTCTTTGTTTCTTCCATCGAAATCGAAAAAGCTAAGATCTTTGCGTTTT  
BTI2 AAAACGCTA---GAACAATAACTTTGATCGTTCTTCTTCTT-----CTCTTGAATC  
BTI3 TTTATTTCG---TCACAGTCTCCTCCACACTCTTCAATCA-GTAAAGAGTTTTAGGTTTT  
\* \* \* \* \* \* \* \* \*

BTI1 TGAAACGATGGCGGAAGAACAATAAGCATGATGAATCTGTGATCGCTCCTGAG-CCAGCTG  
BTI2 GGAAACAATGGCGGATGAACATAAGCATGAAGAATCT-TCACCTAATTTGGATCCAGCAG  
BTI3 TTT-----TTTCTTCTTCTCGGAGGTTTTGTAGAATC-----AACAAAAATG-----GTGG  
\* \* \* \* \* \* \* \* \* \* \* \* \* \*

BTI1 TTGAGGTTGTGGAGAGAGAATCGTTGATGGATAAGATATCGGAGAAGATCCATCACGGTG  
BTI2 TGGAGTTGTAGAGAGGGAATCGTTGATGGAGAAGTTATCGGAGAAGATCCATCACAAAG  
BTI3 AAGACCACAAGCACGAGGAATCGATCTTGGAGAAGATTGTTGAGAAGATCCATGGCCACG  
\* \* \* \* \* \* \* \* \* \* \* \* \* \*

BTI1 GTGATTCTTCTTCGTCTTCTTTCATCTTCTGATGATGAAGACGAGAAGAAGAAGACTAAGA  
BTI2 GTGATTCGTCTTTCATCATCA---TCAGATGACGAAAACGAGAAGAAGT---CTT---  
BTI3 GTGACTCGTCTTC-TCTG-----TCCGATTCCGACGACGATAAGAAAT---CTA---  
\* \* \* \* \* \* \* \* \* \* \* \* \* \* \* \* \* \*

BTI1 AGCCCTCTTCTCCTTCGTCTTCTATGAAATCGAAAGTTTACCGCTTGTTTCGGACGAGAGC  
BTI2 ---CGTCATCGTCTCAAAGTCTTTGAAATCGAAGGTTTATCGTTTGTTTCGGAAGAGAGA  
BTI3 ---CATCGTCTTCGTCTCGTCCTTCAAGTCAAAGATTTACCGACTTTTCGGAAGGGAGA  
\* \* \* \* \* \* \* \* \* \* \* \* \* \* \* \* \* \*

BTI1 AGCCTGTTTCATAAGGTTCTCGGCGGTGGAAAGCGTAAGTTTTTCTCCGATCTGGTTTTAC  
BTI2 GACCTGTTTCATAAGGTTCTCGGCGGCGGAAAACGTATGTTTA-CTCTGATCCCG-----  
BTI3 AACCTGTTTCATAAGGTTCTCGGTGGTGGAAAACGTATG-----GATCT-----  
\* \* \* \* \* \* \* \* \* \* \* \* \* \* \* \* \* \*

BTI1 TTTTCATATATTTGTGTGTTGTGGCTTGATCTGTTTTCTTATATGTGTTGTTTGGTTTA  
BTI2 -----TT-----TCGATATT-----TGT--TCTCAGTTTTT  
BTI3 -----ATCTCTATT-----TCTTCACTTTG  
\* \* \* \* \* \* \* \* \* \* \* \* \* \*

BTI1 TTCTTTTCATTTTGATGGATTAGGTTTCATTGATATGTGTGATTTGAATCTGCACTTGTTT  
BTI2 TAAAACGAATT---CGTTTGCCTTGGCTTGATCTGTTTGATTT---TCTCACTAGTTT  
BTI3 AACTCTGATTTTACTCGATTTTGTATCTTACATA---GTGATTT---TGCTCGA-TCT  
\* \* \* \* \* \* \* \* \* \* \* \* \* \* \* \* \* \*

BTI1 AGGGTTTCTATTTTACTCGTTGATCTGAATCGATCCATCGTGTCCATTTGTATTATTGGG  
BTI2 AAGGGATCCGTGAAGAAGA-TCGTTTGAATCTACATAGAGGTT--TACATTGATTTGAA  
BTI3 AGTGA----ATGTTGCTC--TAATTTGAAGC-----TAAAATTGAG  
\* \* \* \* \* \* \* \* \* \* \*

BTI1 GTTCTTTATTTTGGCATTGTGAGGGTTTAATTAGGGATTCCAT-TTCTA-AATGAATGT  
BTI2 T---TCGATTTGATTTTCTGACTAGTTTGGAGAGAATTTGTGATGGAATTGATTT  
BTI3 ---TGTATTT-----GAGTGCTTAATT--GTCTGCTT-TGCTCGAAAGTACGC  
\* \* \* \* \* \* \* \* \* \* \*

BTI1 TTTGATCATAAAAATGGGTTTTTGACATAATCTCGATATAGAAACCTTACAGTATCAAGT  
BTI2 TTTTTTTTTTGGAAA---TGTGTATAATGATCTTGTG--AGATTCTTGTAGTTATTGATG  
BTI3 TTAAATC-----TTGTGAAATACTC-----AGAAACT-----  
\*\* \* \* \* \* \* \* \* \* \*

BTI1 TCCATGTTTTTCTAATGTGGTTGATTTAGATGACAGTATGTTGTAATGTTTGTCTCAACTT  
BTI2 ---ATATGGTTCTTATTTTCGT-GATTGATAAACCCCTAATTTGGTGATCTTTTTTA--A---  
BTI3 ---ATGTTG---AATCTGG---ATTCAT-----TGTTTGCA-----  
\* \* \* \* \* \* \* \* \* \* \*

BTI1 GATTATTCTTCCTATTTGCAGCGGCTGATATATTCATGTGGAAGAACAAGAAGATGTCTG  
BTI2 -----TTGCAGCGGCAGATATATTTATGTGGAAGGACAAGAAAATGTCTG  
BTI3 -----TGTAGCTGCTGATATATTCCTTTGGAGGAACAAGAAGGTATCTG  
\* \* \* \* \* \* \* \* \* \* \*

BTI1 GTGGTGTACTTGGTGGTGTCTACAGCTGCTTGGGTTGTGTTTGAATTGATGGAGTACCATC  
BTI2 GAGGTGTATTTGGCGGTGCTACAGTGGCATGGGTGCTATTTGAATTGATGGAGTATCATC  
BTI3 GTGGAGTCTTGGGTGCTGTAACCTGCGTCTTGGGTCTTATTGAGTTATTGCAATACCATC  
\* \* \* \* \* \* \* \* \* \* \*

BTI1 TTCTCACTCTGCTTTGCCACGTGATGATTGTTTCTCGCTGTGCTGTTTTTGTGGTCTA  
BTI2 TTCTTACTCTGTTATGTCACGTTATGATCGTTGCTCTTGCTGTGTTGTTTCTATGGTCTA  
BTI3 TCCTCGCTTTTCTCTGTCACTTTGCGATTTTTGCTCTTGCGAGCATTGTTCTTGTGGTCTA  
\* \* \* \* \* \* \* \* \* \* \*

BTI1 ATGCCACTATGTTTCATTAACAAGTAAGTTAAAA--CTGATGAATGTAAATATGTCTCAGC  
BTI2 ATGCCACTATGTTTCATTACAAGTAAGTTTTGTGGTCAATCATATGAAACAGGTCAAGGT  
BTI3 ATGCTTGTACATTCATCCACAAGTATGTT-----CTTACAACATCCCTTATATGTTAAG  
\* \* \* \* \* \* \* \* \* \* \*

BTI1 TTATGAT--TATTCACCTG-TGCATTGTTGACA-ATTG--ATTCTCTGTCAGGTCCCCTC  
BTI2 TGTCAAGCTTATTTGACTCAT-CTTCGTTACCAAATTTTCATTCTCTTTGAGGTCTCCAC  
BTI3 TGTTAAG--TATGAGATAACTGCCTGATCAACTGAGTT--CTTATCC-TCAGGTCAACTC  
\* \* \* \* \* \* \* \* \* \* \*

BTI1 CAAAGATTCCCTGAAGTTCATATCCCTGAAGAACCTATTCTTCAGCTTGCGTCTGGGCTCA  
BTI2 CAAAGATTCCCTGAAGTTCATATCCCTGAAGAACCTCTTCTTCAGCTTGCTTCGGGTCTTA  
BTI3 CTCACATCCCAGGAAAGTTCACATCCCTGAAGATCCTATTCTTCAACTTGTTTCTGGATTAA  
\* \* \* \* \* \* \* \* \* \* \*

BTI1 GAATCGAGATCAACCGTGGATTCTTCTCTCCGTGAAATTGCATCAGGAAGGGATCTCA  
BTI2 GAATCGAAATCAACCGTGGGATCTCTTCTCTTCGTGAGATTGCGTCGGGGAGGGATATCA  
BTI3 GGATTGAAATCAATCGTGGTTTTGACCCTTCTTAGGAACATTGCATCAGGAAAAGATGTCA  
\* \* \* \* \* \* \* \* \* \* \*



BTI1 TATAACTA-AGAATTTCAAGATATTTGAATTTTGCAATCTCGTGGTTAATGT--TGTTCT  
BTI2 TGTTTTTGGAGTGGTTTTGTGGCATTAGCACAATGA----TTGTAGTCGTTCTCTTGATCT  
BTI3 TGGA--TG-ATAATTATT-GTTGTTAGTTATTTG-----TCTTAGTTAATTTTC-TCATCC  
\* \* \* \* \* \* \* \* \* \* \* \* \* \* \* \* \* \* \* \* \*

BTI1 TTCTCTATATTCTCCTCTTTTCATTACATTTGTAAAATGGAATCAATGTCACGAATTGATA  
BTI2 ATATTTTTTAATGT-----  
BTI3 TTTT-----  
\* \*

BTI1 AGTTGTACGAAGCTTATACGTTTTTATAGTTTCTTACTA  
BTI2 -----  
BTI3 -----
