# Supplementary material
Source: PubMed Central journal article supplement (PMC527204)
Supplement: plntcell_tpc.104.026476_6.pdf [file plntcell_tpc.104.026476_6.pdf]

| Plant line     | % of roots with tumors | % of roots with PPT-resistant calli | % of roots showing GUS activity 6 days after infection |
|----------------|------------------------|-------------------------------------|--------------------------------------------------------|
| Wild-type (Ws) | 94.7± 1.1              | 86.7± 1.5                           | 54.6± 10.5                                             |
| A/S BTI1-14    | 41.2± 3.3              | 23.4± 4.8                           | 18.3± 1.3                                              |
| A/S BTI1-16    | 40.1± 4.5              | 39.8± 4.1                           | 17.9± 2.0                                              |
| A/S BTI1-104   | 26.7± 2.3              | 9.2± 1.0                            | 21.3± 2.8                                              |
| A/S BTI2-26    | 55.5± 3.4              | 38.8± 2.5                           | 25.1± 1.8                                              |
| A/S BTI2-29    | 34.4± 3.4              | 32.5± 4.5                           | 11.9± 1.7                                              |
| A/S BTI2-132   | 22.9± 2.6              | 28.8± 2.6                           | 14.3± 1.4                                              |
| A/S BTI2-107   | 19.1± 3.1              | 40.5± 3.0                           | 8.1± 0.8                                               |
| A/S AtRAB8-3   | 20.3± 1.9              | 47.5± 2.9                           | 10.4± 0.8                                              |
| A/S AtRAB8-17  | 16.3± 2.1              | 26.7± 2.2                           | 10.8± 1.2                                              |
| A/S AtRAB8-19  | 15.3± 2.3              | 29.3± 1.8                           | 20.6± 2.0                                              |
| A/S AtRAB8-28  | 18.7± 2.0              | 36.6± 3.4                           | 15.4± 1.9                                              |

Supplemental Table 1. Stable and transient transformation assays of T2 generation transgenic *BTI1*, *BTI2*, and *AtRAB8* anti-sense (A/S) plants. Data are indicated as average values of results from 20 plants ± standard error. At least 80 root segments were examined for each plant.
