# Supplementary material
Source: PubMed Central journal article supplement (PMC527204)
Supplement: plntcell_tpc.104.026476_7.pdf [file plntcell_tpc.104.026476_7.pdf]

| <b>Plant line</b> | <b>% of roots with tumors</b> | <b>% of roots showing GUS activity 6 days after infection</b> |
|-------------------|-------------------------------|---------------------------------------------------------------|
| Wild-type (Ws)    | 82.7± 3.0                     | 48.3± 3.9                                                     |
| RNAi BTI1-22      | 20.3± 3.2                     | 12.2± 1.7                                                     |
| RNAi BTI1-23      | 17.7± 4.4                     | 11.3± 1.5                                                     |
| RNAi BTI1-24      | 12.3± 3.2                     | 20.5± 2.5                                                     |
| RNAi BTI1-27      | 26.3± 2.7                     | 17.3± 1.8                                                     |
| RNAi BTI2-42      | 19.1± 2.3                     | 25.5± 6.7                                                     |
| RNAi BTI2-45      | 10.3± 0.8                     | 10.9± 1.1                                                     |
| RNAi BTI2-47      | 15.3± 2.0                     | 20.6± 2.7                                                     |
| RNAi BTI3-7       | 14.3± 2.5                     | 13.8± 2.5                                                     |
| RNAi BTI3-16      | 8.3± 1.5                      | 17.0± 2.3                                                     |
| RNAi BTI3-18      | 10.6± 1.9                     | 17.8± 2.4                                                     |
| RNAi BTI3-83      | 17.2± 4.2                     | 38.4± 5.8                                                     |
| RNAi AtRAB8-9     | 10.2± 2.7                     | 14.3± 2.5                                                     |
| RNAi AtRAB8-11    | 12.1± 2.0                     | 20.1± 1.0                                                     |
| RNAi AtRAB8-22    | 12.4± 3.3                     | 11.3± 2.4                                                     |

Supplemental Table 2. Stable and transient transformation assays of T2 generation transgenic *BTI1*, *BTI2*, *BTI3*, and *AtRAB8* RNA interference (RNAi) plants. Data are indicated as average values of results from 20 plants ± standard error. At least 80 root segments were examined for each plant.
