# Supplementary material
Source: PubMed Central journal article supplement (PMC527204)
Supplement: plntcell_tpc.104.026476_8.pdf [file plntcell_tpc.104.026476_8.pdf]

| <b>Plasmid</b> | <b>Description</b>                                                                                                                               | <b>Selectable Marker<sup>a</sup></b> | <b>Reference or Source</b> |
|----------------|--------------------------------------------------------------------------------------------------------------------------------------------------|--------------------------------------|----------------------------|
| pSST91         | Cloning vector for the construction of LexA fusions                                                                                              | <i>trp1</i> , Amp <sup>r</sup>       | V. Citovsky                |
| pGAD424        | Cloning vector for the construction of GAL4 activator fusions                                                                                    | <i>leu2</i> , Amp <sup>r</sup> ,     | CLONTECH                   |
| pSST-lamin     | Detects false-positives in the two-hybrid screens. Contains a human lamin C fragment fused to LexA in pSST91                                     | <i>trp1</i> , Amp <sup>r</sup>       | V. Citovsky                |
| pE2180         | <i>EcoRI-PstI</i> fragment of VirB2 (octopine-type pTiA6) obtained by PCR amplification in pSST91 (LexA-VirB2 fusion; a.a. 48 to 121 of VirB2)   | <i>trp1</i> , Amp <sup>r</sup>       | This Study                 |
| pE2177         | <i>EcoRI-BamHI</i> fragment of VirB2 (nopaline-type pTiC58) obtained by PCR amplification in pSST91 (LexA-VirB2 fusion; a.a. 48 to 121 of VirB2) | <i>trp1</i> , Amp <sup>r</sup>       | This Study                 |
| pE2251         | <i>EcoRI-PstI</i> fragment of VirB1 (octopine-type pTiA6) obtained by PCR amplification in pSST91 (LexA-VirB1 fusion)                            | <i>trp1</i> , Amp <sup>r</sup>       | This Study                 |
| pE2174         | <i>EcoRI-PstI</i> fragment of VirB1 (nopaline-type pTiC58) obtained by PCR amplification in pSST91 (LexA-VirB1 fusion)                           | <i>trp1</i> , Amp <sup>r</sup>       | This Study                 |

| <b>Plasmid</b> | <b>Description</b> | <b>Selectable</b> | <b>Reference</b> |
|----------------|--------------------|-------------------|------------------|
|----------------|--------------------|-------------------|------------------|

|        |                                                                                                                                     | <b>Marker<sup>a</sup></b>      | <b>or Source</b> |
|--------|-------------------------------------------------------------------------------------------------------------------------------------|--------------------------------|------------------|
| pE2183 | <i>EcoRI-BamHI</i> fragment of VirB5 (octopine-type pTiA6) obtained by PCR amplification in pSST91 (LexA-VirB5 fusion)              | <i>trp1</i> , Amp <sup>r</sup> | This Study       |
| pE1912 | <i>EcoRI-XbaI</i> fragment of VirD2 (octopine-type pTiA6) cloned into the <i>EcoRI/SalI</i> sites of pSST91 (LexA-VirD2 fusion)     | <i>trp1</i> , Amp <sup>r</sup> | Laboratory stock |
| pE2048 | <i>BamHI-XhoI</i> fragment of VirE2 (octopine-type pTiA6) cloned into the <i>BamHI/SalI</i> sites of pSST91 (LexA-VirE2 fusion)     | <i>trp1</i> , Amp <sup>r</sup> | Laboratory stock |
| pE2105 | <i>EcoRI-SalI</i> fragment of VirF (octopine-type pTiA6) cloned into the <i>EcoRI/SalI</i> sites of pGAD424 (GAL4 AD-VirF fusion)   | <i>leu2</i> , Ampr             | Laboratory stock |
| pE1911 | <i>EcoRI-XbaI</i> fragment of VirE1 (octopine-type pTiA6) cloned into the <i>EcoRI/SalI</i> sites of pGAD424 (GAL4 AD-VirE1 fusion) | <i>leu2</i> , Ampr             | Laboratory stock |
| pE2093 | <i>EcoRI-PstI</i> fragment of BTI1 obtained by PCR amplification in pGAD424 (GAL4 AD-BTI1 fusion)                                   | <i>leu2</i> , Ampr             | This Study       |

| <b>Plasmid</b> | <b>Description</b>                                                                                                                   | <b>Selectable Marker<sup>a</sup></b> | <b>Reference or Source</b> |
|----------------|--------------------------------------------------------------------------------------------------------------------------------------|--------------------------------------|----------------------------|
| pE1987         | <i>EcoRI-PstI</i> fragment of BTI2 obtained by PCR amplification in pGAD424 (GAL4 AD-BTI2 fusion)                                    | <i>leu2</i> , Amp <sup>r</sup>       | This Study                 |
| pE1988         | <i>EcoRI-PstI</i> fragment of BTI3 obtained by PCR amplification in pGAD424 (GAL4 AD-BTI3 fusion)                                    | <i>leu2</i> , Amp <sup>r</sup>       | This Study                 |
| pE1986         | <i>EcoRI-PstI</i> fragment of AtRAB8 obtained by PCR amplification in pGAD424 (GAL4 AD-AtRAB8 fusion)                                | <i>leu2</i> , Amp <sup>r</sup>       | This Study                 |
| pE2096         | <i>EcoRI-PstI</i> fragment of AtRAB8 obtained by PCR amplification in pSST91 (LexA-AtRAB8 fusion)                                    | <i>trp1</i> , Amp <sup>r</sup>       | This Study                 |
| pE2092         | <i>EcoRI-PstI</i> fragment of BTI1 obtained by PCR amplification in pSST91 (LexA-BTI1 fusion)                                        | <i>trp1</i> , Amp <sup>r</sup>       | This Study                 |
| pE2091         | <i>EcoRI-PstI</i> fragment of BTI2 obtained by PCR amplification in pSST91 (LexA-BTI2 fusion)                                        | <i>trp1</i> , Amp <sup>r</sup>       | This Study                 |
| pE2094         | <i>EcoRI-PstI</i> fragment of BTI3 obtained by PCR amplification in pSST91 (LexA-BTI3 fusion)                                        | <i>trp1</i> , Amp <sup>r</sup>       | This Study                 |
| pE2499         | <i>EcoRI-PstI</i> fragment of BTI1-A obtained by PCR amplification in pGAD424 (GAL4 AD-BTI-A fusion; a.a. 7-100 of BTI1 was deleted) | <i>leu2</i> , Amp <sup>r</sup>       | This Study                 |

| <b>Plasmid</b> | <b>Description</b>                                                                                                                        | <b>Selectable Marker<sup>a</sup></b> | <b>Reference or Source</b> |
|----------------|-------------------------------------------------------------------------------------------------------------------------------------------|--------------------------------------|----------------------------|
| pE2501         | <i>EcoRI-PstI</i> fragment of BTI1-B obtained by PCR amplification in pGAD424 (GAL4 AD-BTI-B fusion; a.a. 107-140 of BTI1 was deleted)    | <i>leu2</i> , Amp <sup>r</sup>       | This Study                 |
| pE2525         | <i>EcoRI-PstI</i> fragment of BTI1-C obtained by PCR amplification in pGAD424 (GAL4 AD-BTI-C fusion; a.a. 147-180 of BTI1 was deleted)    | <i>leu2</i> , Amp <sup>r</sup>       | This Study                 |
| pE2504         | <i>EcoRI-PstI</i> fragment of BTI1-D obtained by PCR amplification in pGAD424 (GAL4 AD-BTI-D fusion; a.a. 187-231 of BTI1 was deleted)    | <i>leu2</i> , Amp <sup>r</sup>       | This Study                 |
| pE2506         | <i>EcoRI-PstI</i> fragment of BTI1-E obtained by PCR amplification in pGAD424 (GAL4 AD-BTI-E fusion; a.a. 238-260 of BTI1 was deleted)    | <i>leu2</i> , Amp <sup>r</sup>       | This Study                 |
| pE2508         | <i>EcoRI-PstI</i> fragment of BTI1-AN obtained by PCR amplification in pGAD424 (GAL4 AD-BTI-AN fusion; a.a. 7-275 of BTI1 was deleted)    | <i>leu2</i> , Amp <sup>r</sup>       | This Study                 |
| pE2510         | <i>EcoRI-PstI</i> fragment of BTI1-BN obtained by PCR amplification in pGAD424 (GAL4 AD-BTI-BN fusion; a.a. 107-275 of BTI1 was deleted)  | <i>leu2</i> , Amp <sup>r</sup>       | This Study                 |
| pE2512         | <i>EcoRI-PstI</i> fragment of BTI1-CN obtained by PCR amplification in pGAD424 (GAL4 AD-BTI-CN fusion; a.a. 147- 275 of BTI1 was deleted) | <i>leu2</i> , Amp <sup>r</sup>       | This Study                 |

|        |                                                                                                                                           |                                |            |
|--------|-------------------------------------------------------------------------------------------------------------------------------------------|--------------------------------|------------|
| pE2527 | <i>EcoRI-PstI</i> fragment of BTI1-DN obtained by PCR amplification in pGAD424 (GAL4 AD-BTI-CN fusion; a.a. 187- 275 of BTI1 was deleted) | <i>leu2</i> , Amp <sup>r</sup> | This Study |
|--------|-------------------------------------------------------------------------------------------------------------------------------------------|--------------------------------|------------|

<sup>a</sup>*leu2*, leucine synthase gene; *trp1*, tryptophan synthase gene; Amp<sup>r</sup>, ampicillin.

Supplemental Table 3. Plasmids used in the yeast two-hybrid assays
