# Supplementary material
Source: PubMed Central journal article supplement (PMC527204)

**A**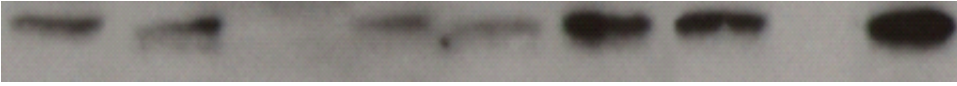**B**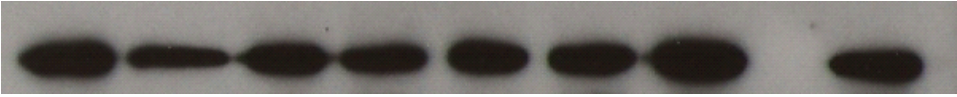

A/S BTII-104    RNAi BTII-27    RNAi BTII-24    RNAi BTII-23    RNAi BTII-22    A/S BTII-16    A/S BTII-14    Wildtype (Ws)

**C**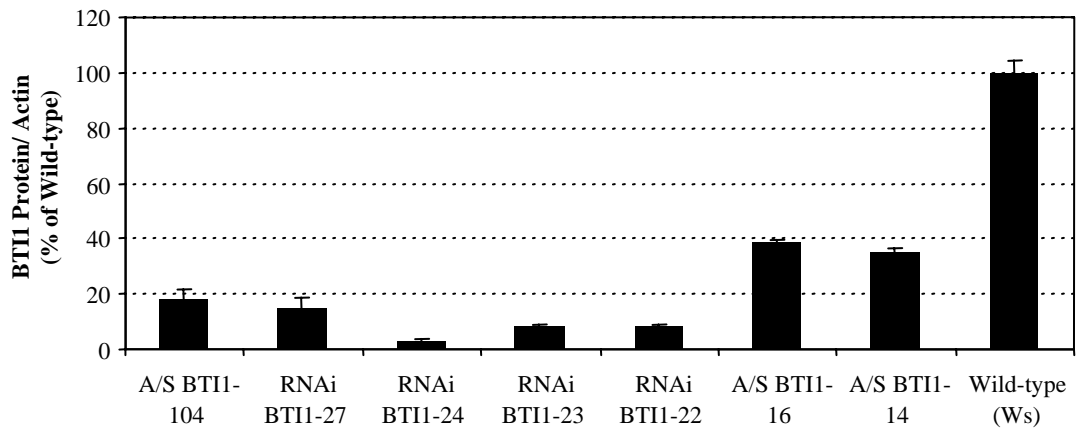

Supplement: plntcell_tpc.104.026476_4.pdf [file plntcell_tpc.104.026476_4.pdf]

**A**

**1**

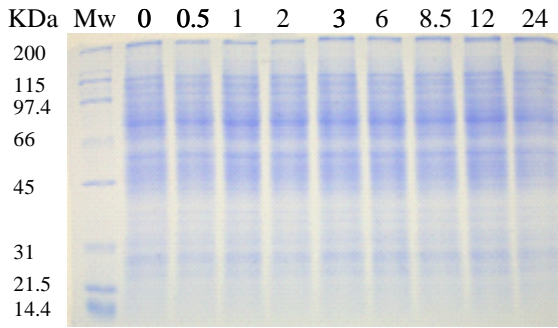

**2**

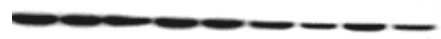

**3**

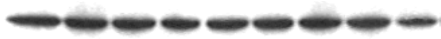

**B**

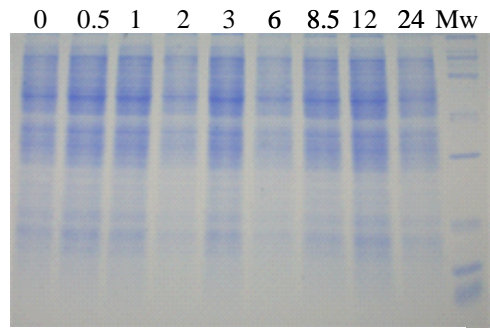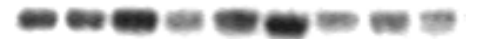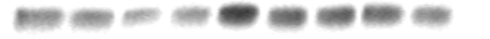

Supplement: plntcell_tpc.104.026476_5.pdf [file plntcell_tpc.104.026476_5.pdf]
